# Supplementary material for: Function and X-Ray crystal structure of Escherichia coli YfdE
Source: PubMed Central journal article supplement (PMC3720670; doi:10.1371/journal.pone.0067901), 2013-07-23
Supplement: pone.0067901.s002.pdf [file pone.0067901.s002.pdf]

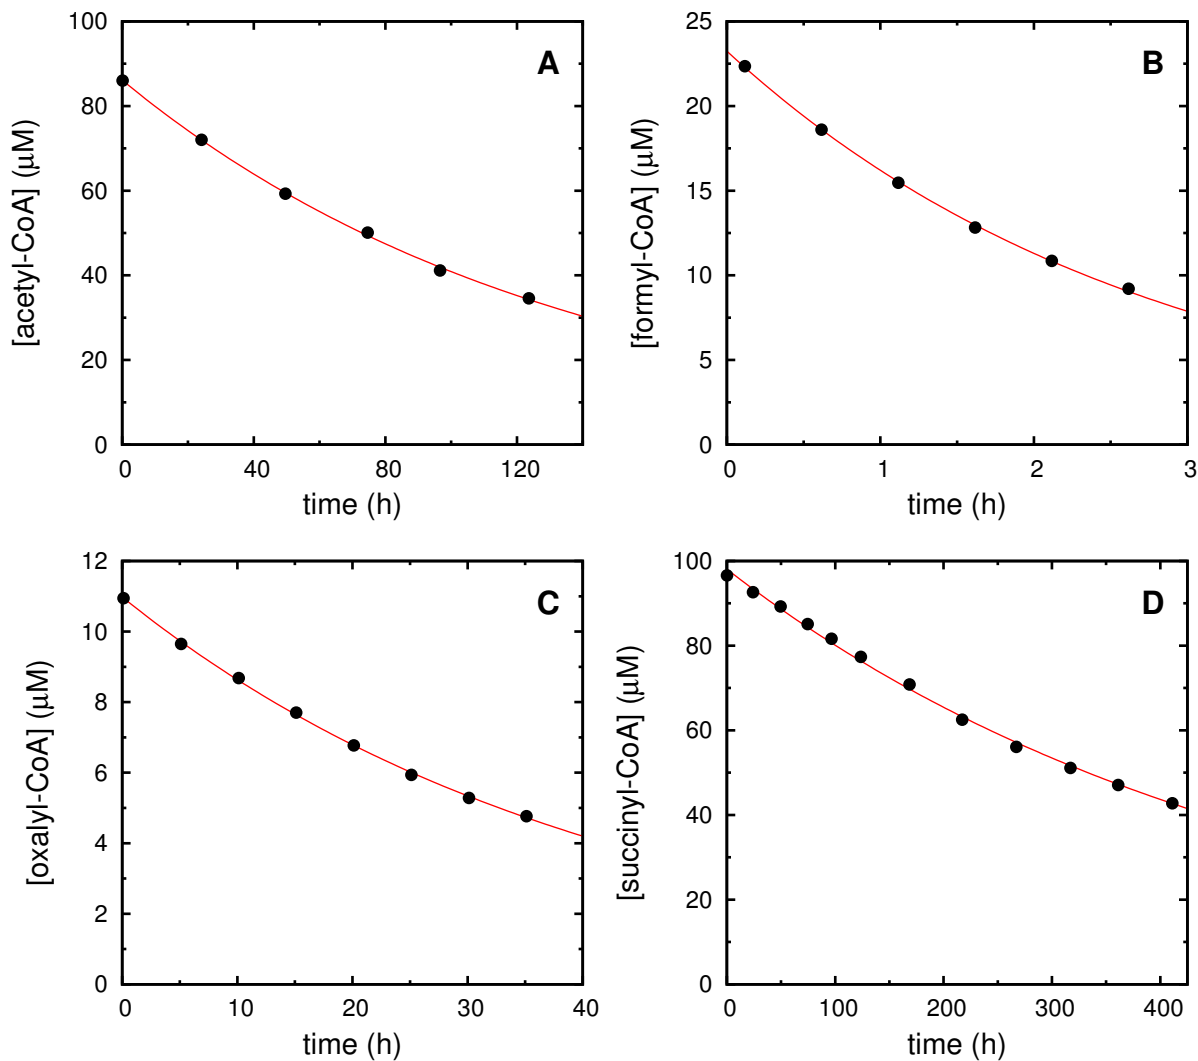

**Figure S2. Acyl-CoA hydrolysis half-lives.** Determination of the half-lives for spontaneous acyl-CoA hydrolysis in quenched reaction mixtures. Each solid line represents a fit of the data to the function  $[A]_t = [A]_0 \exp(-kt)$ . (A) Acetyl-CoA half-life is 92 h:  $[A]_0 = 86 \mu\text{M}$  and  $k = 0.0075 \pm 0.0001 \text{ h}^{-1}$ . (B) Formyl-CoA half-life is 1.9 h:  $[A]_0 = 23 \mu\text{M}$  and  $k = 0.361 \pm 0.004 \text{ h}^{-1}$ . (C) Oxalyl-CoA half-life is 29 h:  $[A]_0 = 11.0 \mu\text{M}$  and  $k = 0.0240 \pm 0.0003 \text{ h}^{-1}$ . (D) Succinyl-CoA half-life is 343 h:  $[A]_0 = 98 \mu\text{M}$  and  $k = 0.00202 \pm 0.00003 \text{ h}^{-1}$ .
