# Supplementary material for: Function and X-Ray crystal structure of Escherichia coli YfdE
Source: PubMed Central journal article supplement (PMC3720670; doi:10.1371/journal.pone.0067901), 2013-07-23
Supplement: pone.0067901.s004.pdf [file pone.0067901.s004.pdf]

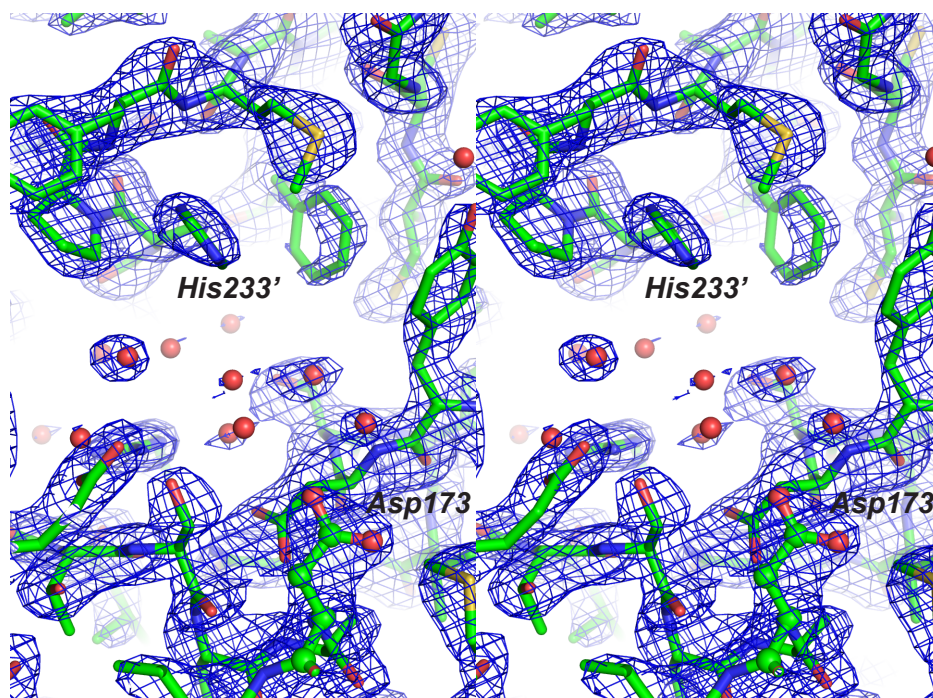

**Figure S4. Stereogram of electron density in the H6YfdE active site.** The active site formed by subunits A and B is depicted from the perspective of Figure 6. Asp173 is shown in ball-and-stick rendering. Other protein atoms and waters are shown in stick and sphere rendering, respectively. The  $\sigma A$ -weighted  $2mF_o - DF_c$  electron density map (blue mesh) is contoured at  $1.2\sigma$  and carved with a  $2.5 \text{ \AA}$  radius.
