# Supplementary material for: Function and X-Ray crystal structure of Escherichia coli YfdE
Source: PubMed Central journal article supplement (PMC3720670; doi:10.1371/journal.pone.0067901), 2013-07-23
Supplement: pone.0067901.s005.pdf [file pone.0067901.s005.pdf]

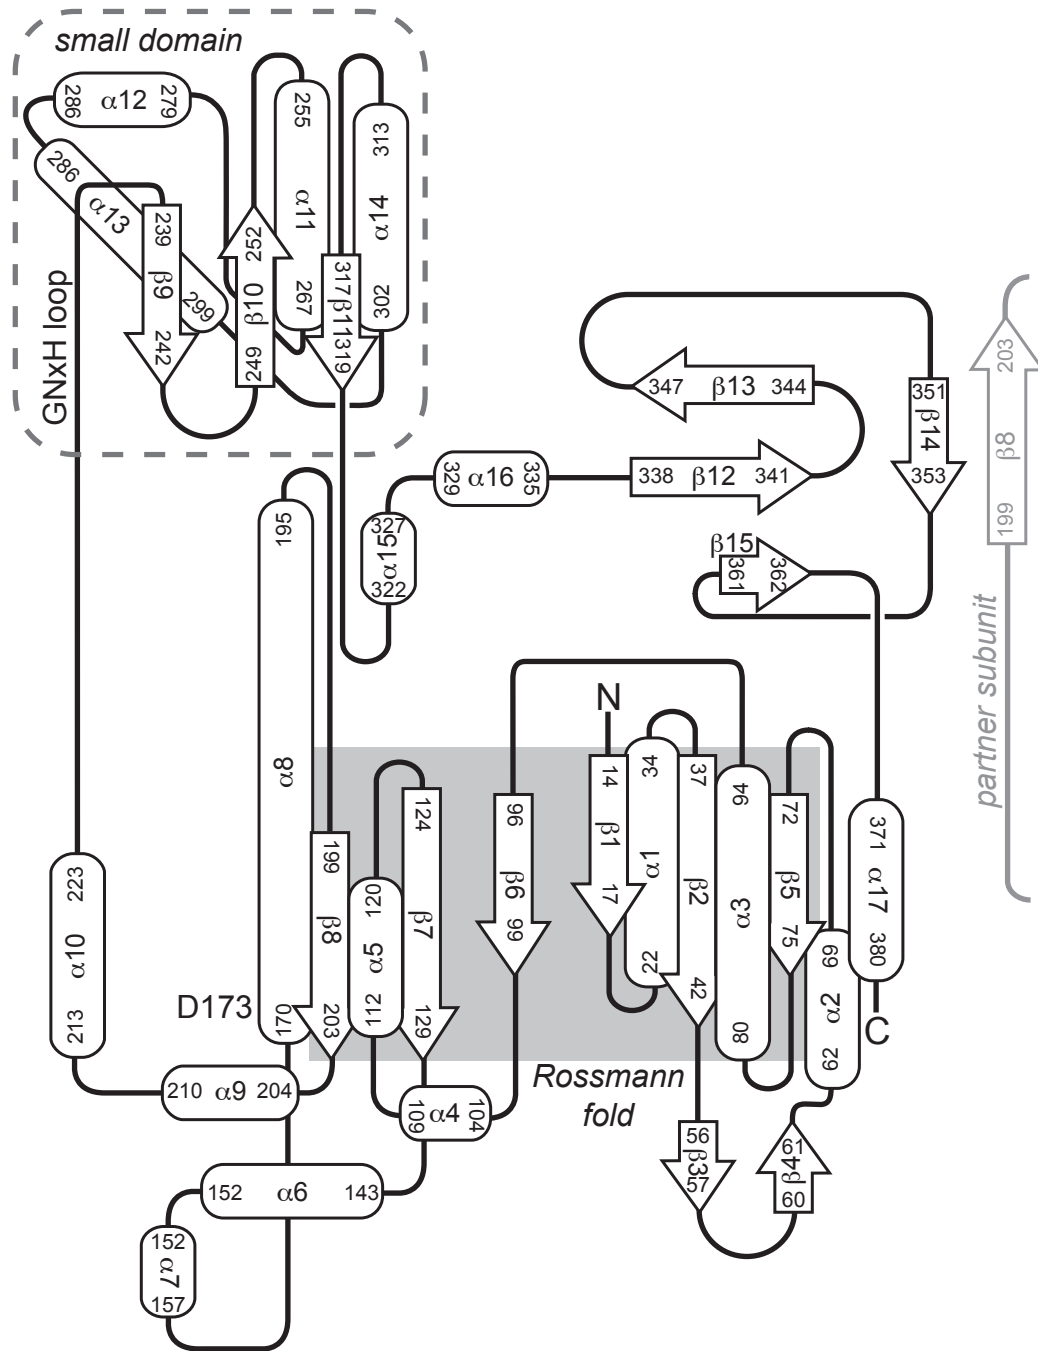

Figure S5. Topology diagram for H6YfdE.
