# Supplementary material for: Function and X-Ray crystal structure of Escherichia coli YfdE
Source: PubMed Central journal article supplement (PMC3720670; doi:10.1371/journal.pone.0067901), 2013-07-23
Supplement: pone.0067901.s007.pdf [file pone.0067901.s007.pdf]

**Table S1. Mass spectrometric characterization of YfdE and UctC.**

| Sample     | Observed (Da) | Expected <sup>a</sup> (Da) |
|------------|---------------|----------------------------|
| H6YfdE     | 43,702        | 43,703                     |
| YfdEH6     | 42,822        | 42,823 <sup>b</sup>        |
|            | 43,569        | 43,571 <sup>b,c</sup>      |
| UctC       | 41,708        | 41,709 <sup>d</sup>        |
| UctC-D177A | 41,664        | 41,665 <sup>d</sup>        |

<sup>a</sup> Computed assuming that Met1 is removed, except as noted.

<sup>b</sup> Retains Met1.

<sup>c</sup> Aspartyl-CoA thioester adduct.

<sup>d</sup> Thr2→Ala mutant.
