# Supplementary material for: Function and X-Ray crystal structure of Escherichia coli YfdE
Source: PubMed Central journal article supplement (PMC3720670; doi:10.1371/journal.pone.0067901), 2013-07-23
Supplement: pone.0067901.s008.pdf [file pone.0067901.s008.pdf]

**Table S2. Pairwise comparison of eight class III CoA-transferase superfamily members.<sup>a</sup>**

|                      | ACOCT          | Unknown        | CaiB           | Racemase       |                | FCOCT          |                |                |
|----------------------|----------------|----------------|----------------|----------------|----------------|----------------|----------------|----------------|
| UniProt<br>PDB entry | P76518<br>4hl6 | Q8G0K8<br>4ed9 | O06543<br>1x74 | O53867<br>2g04 | P31572<br>1xk7 | O06644<br>1p5h | A9X6P7<br>3ubm | P69902<br>1pt7 |
| 4hl6                 | –              | 56.8           | 43.4           | 44.1           | 39.5           | 49.3           | 49             | 49.5           |
| 4ed9                 | <b>38.3</b>    | –              | 45.3           | 42             | 42.7           | 47.3           | 49             | 50.7           |
| 1x74                 | <b>25.6</b>    | <b>30.4</b>    | –              | 74.4           | 42             | 41.1           | 43.8           | 44.1           |
| 2g04                 | <b>27.3</b>    | <b>29.2</b>    | <b>58.1</b>    | –              | 39.8           | 41.7           | 43.8           | 42.9           |
| 1xk7                 | <b>22.5</b>    | <b>25.1</b>    | <b>24.2</b>    | <b>22.2</b>    | –              | 40.1           | 42.3           | 42.5           |
| 1p5h                 | <b>30.7</b>    | <b>29.1</b>    | <b>25.1</b>    | <b>23.3</b>    | <b>23.0</b>    | –              | 73.8           | 75.4           |
| 3ubm                 | <b>31.2</b>    | <b>29.0</b>    | <b>26.2</b>    | <b>25.6</b>    | <b>25.8</b>    | <b>58.5</b>    | –              | 84             |
| 1pt7                 | <b>31.0</b>    | <b>30.3</b>    | <b>25.1</b>    | <b>24.5</b>    | <b>24.3</b>    | <b>60.2</b>    | <b>70.7</b>    | –              |

<sup>a</sup> Pairwise percentage identities (bold font, below the diagonal) and similarities (normal font, above the diagonal) in the structure-based sequence alignment (Figure S6).
