# Supplementary material for: Function and X-Ray crystal structure of Escherichia coli YfdE
Source: PubMed Central journal article supplement (PMC3720670; doi:10.1371/journal.pone.0067901), 2013-07-23
Supplement: pone.0067901.s009.pdf [file pone.0067901.s009.pdf]

**Table S3. Oligodeoxynucleotides used in this study.**

| ODN  | Sequence (5' → 3') <sup>a</sup>                          |
|------|----------------------------------------------------------|
| 2151 | <i>CAT AAG CAT</i> ATG ACA AAT AAT GAA AGC AAA GGG       |
| 2152 | <i>AGC ACA TCC TCG</i> AGT TAT GAT GAG AAC TCC TGG CGA A |
| 2180 | CCA TGT AGG GAT GGC GAT TTC CCA GAC                      |
| 2181 | GTC TGG GAA ATC GCC ATC CCT ACA TGG                      |
| 2216 | CAT CGC TTT CTG <u>CTC</u> TGT GCG GTG G                 |
| 2217 | CCA CCG CAC AGA <u>GCA</u> GAA AGC GAT G                 |
| 2227 | <i>GGT GGT GCT CGA</i> <u>GTG</u> ATG ATG AGA ACT C      |
| 2228 | GAG TTC TCA TCA <u>TCA</u> <i>CTC GAG CAC CAC C</i>      |

<sup>a</sup> Vector sequences are in italics. Changes in the coding region relative to the genomic sequence are underlined.
